# Supplementary material for: Shoulder pain and disability index: cross cultural validation and evaluation of psychometric properties of the Spanish version
Source: Springer Nature journal article supplement (doi:10.1186/s12955-015-0397-z), 2015-12-01
Supplement: MOESM1 [file 9764330]

## **SHOULDER AND PAIN DISABILITY INDEX (SPADI-Sp)**

*Por favor, ponga una cruz en el número que mejor represente su experiencia durante la última semana como consecuencia de su problema de hombro.*

Escala de dolor: ¿Cómo de grave es el dolor?

*Ponga una cruz en el número que mejor describa su dolor, donde: 0 = ausencia de dolor y 10 = el peor dolor imaginable*

|                                              |   |   |   |   |   |   |   |   |   |   |    |
|----------------------------------------------|---|---|---|---|---|---|---|---|---|---|----|
| ¿En su peor momento?                         | 0 | 1 | 2 | 3 | 4 | 5 | 6 | 7 | 8 | 9 | 10 |
| ¿Cuándo se tumba sobre ese lado?             | 0 | 1 | 2 | 3 | 4 | 5 | 6 | 7 | 8 | 9 | 10 |
| ¿Al alcanzar algo en un estante alto?        | 0 | 1 | 2 | 3 | 4 | 5 | 6 | 7 | 8 | 9 | 10 |
| ¿Al tocarse la parte posterior de su cuello? | 0 | 1 | 2 | 3 | 4 | 5 | 6 | 7 | 8 | 9 | 10 |
| ¿Al empujar con el brazo afecto?             | 0 | 1 | 2 | 3 | 4 | 5 | 6 | 7 | 8 | 9 | 10 |

Escala de Discapacidad: ¿Cuánta dificultad tiene usted?

*Ponga una cruz en el número que mejor describa su experiencia, donde: 0 = sin dificultad y 10 = tan difícil que requiere ayuda.*

|                                                 |   |   |   |   |   |   |   |   |   |   |    |
|-------------------------------------------------|---|---|---|---|---|---|---|---|---|---|----|
| ¿Lavándose el pelo?                             | 0 | 1 | 2 | 3 | 4 | 5 | 6 | 7 | 8 | 9 | 10 |
| ¿Lavándose la espalda?                          | 0 | 1 | 2 | 3 | 4 | 5 | 6 | 7 | 8 | 9 | 10 |
| ¿Poniéndose una camiseta o un jersey?           | 0 | 1 | 2 | 3 | 4 | 5 | 6 | 7 | 8 | 9 | 10 |
| ¿Poniéndose una camisa con los botones delante? | 0 | 1 | 2 | 3 | 4 | 5 | 6 | 7 | 8 | 9 | 10 |
| ¿Poniéndose los pantalones?                     | 0 | 1 | 2 | 3 | 4 | 5 | 6 | 7 | 8 | 9 | 10 |
| ¿Colocando un objeto en un estante alto?        | 0 | 1 | 2 | 3 | 4 | 5 | 6 | 7 | 8 | 9 | 10 |
| ¿Llevando un objeto pesado (4.5 kg)?            | 0 | 1 | 2 | 3 | 4 | 5 | 6 | 7 | 8 | 9 | 10 |
| ¿Cogiendo algo de su bolsillo trasero?          | 0 | 1 | 2 | 3 | 4 | 5 | 6 | 7 | 8 | 9 | 10 |
